# Supplementary material for: A {Zn4} cluster as a bi-functional luminescence sensor for highly sensitive detection of chloride ions and histidine in aqueous media
Source: Royal Society of Chemistry journal article supplement (doi:10.1039/d2tc01610a), 2022-01-01
Supplement: d2tc01610a1.pdf [file d2tc01610a1.pdf]

# **A {Zn<sub>4</sub>} cluster as a bi-functional luminescence sensor for highly sensitive detection of chloride ion and histidine in aqueous media**

Jing Li, Ke-Xin Ma, Yan Yang, Hua Yang, Jing Lu, Da-Cheng Li, Jian-Min Dou,  
Hui-Yan Ma,\* Su-Na Wang\* and Yun-Wu Li\*

---

*Shandong Provincial Key Laboratory of Chemical Energy Storage and Novel Cell Technology, and School of Chemistry and Chemical Engineering, Liaocheng University, Liaocheng 252000, P. R. China.*

---

*E-mails: [mahuiyanyan@163.com](mailto:mahuiyanyan@163.com); [wangsuna@lcu.edu.cn](mailto:wangsuna@lcu.edu.cn); [liyunwu@lcu.edu.cn](mailto:liyunwu@lcu.edu.cn).*

**Table S1** Crystal data and structure refinement parameters for the **{Zn<sub>4</sub>}** cluster.

| Complex            |                                                                                                 | {Zn <sub>4</sub> }                           |               |
|--------------------|-------------------------------------------------------------------------------------------------|----------------------------------------------|---------------|
| Formula            | C <sub>48</sub> H <sub>46</sub> Cl <sub>2</sub> N <sub>20</sub> O <sub>12</sub> Zn <sub>4</sub> | $\gamma$ [°]                                 | 90.00         |
| $F_w$              | 1427.43                                                                                         | $V$ (Å <sup>3</sup> )                        | 2931.0(2)     |
| $\lambda/\text{Å}$ | 1.54178                                                                                         | $Z$                                          | 2             |
| $T/K$              | 298.15                                                                                          | $D_c/\text{Mg/m}^3$                          | 1.617         |
| Crystal system     | Monoclinic                                                                                      | $F(000)$                                     | 1448.0        |
| Space group        | P12 <sub>1</sub> /c1                                                                            | Reflections collected/unique                 | 10918/5112    |
| $a$ [Å]            | 10.1349(5)                                                                                      | $R_{\text{int}}$                             | 0.0560        |
| $b$ [Å]            | 19.5541(8)                                                                                      | Data/Restraints/Parameters                   | 5112/1118/38  |
|                    |                                                                                                 |                                              | 8             |
| $c$ [Å]            | 15.0215(7)                                                                                      | $R_1/wR_2$ [ $I > 2\sigma(I)$ ] <sup>a</sup> | 0.0693/0.1957 |
| $\alpha$ [°]       | 90.00                                                                                           | $R_1/wR_2$ [(all data)] <sup>b</sup>         | 0.1140/0.2270 |
| $\beta$ [°]        | 100.074(5)                                                                                      | GOF on $F^2$                                 | 1.030         |

<sup>a</sup> $R_1 = \Sigma(|F_o| - |F_c|)/\Sigma|F_o|$ ; <sup>b</sup> $wR_2 = [\Sigma w(|F_o|^2 - |F_c|^2)^2 / (\Sigma w|F_o|^2)]^{1/2}$ .

**Table S2** The selected bond lengths [Å] and angles [°] of the **{Zn<sub>4</sub>}** cluster.

|                      |            |                      |            |
|----------------------|------------|----------------------|------------|
| N(9)-Zn(1)#1         | 2.286(6)   | Zn(1)-N(1)           | 2.001(6)   |
| N(7)-Zn(1)#1         | 2.015(6)   | Zn(2)-Cl(1)          | 2.187(2)   |
| Zn(1)-Zn(1)#1        | 3.160(2)   | Zn(2)-O(3)           | 2.015(4)   |
| Zn(1)-O(3)           | 2.051(5)   | Zn(2)-N(6)           | 2.023(6)   |
| Zn(1)-O(3)#1         | 2.160(5)   | Zn(2)-N(2)           | 1.993(6)   |
|                      |            |                      |            |
| C(15)-N(9)-Zn(1)#1   | 129.4(5)   | C(14)-N(9)-Zn(1)#1   | 113.3(5)   |
| C(13)-N(7)-Zn(1)#1   | 121.3(5)   | N(6)-N(7)-Zn(1)#1    | 131.4(4)   |
| N(9)#1-Zn(1)-Zn(1)#1 | 136.96(18) | N(7)#1-Zn(1)-N(9)#1  | 73.7(2)    |
| N(7)#1-Zn(1)-Zn(1)#1 | 107.00(17) | N(7)#1-Zn(1)-O(3)#1  | 87.4(2)    |
| N(7)#1-Zn(1)-O(3)    | 119.8(2)   | O(3)#1-Zn(1)-N(9)#1  | 158.9(2)   |
| O(3)-Zn(1)-N(9)#1    | 98.2(2)    | O(3)#1-Zn(1)-Zn(1)#1 | 40.08(13)  |
| O(3)-Zn(1)-Zn(1)#1   | 42.70(13)  | O(3)-Zn(1)-O(3)#1    | 82.79(19)  |
| N(1)-Zn(1)-N(9)#1    | 99.4(2)    | N(1)-Zn(1)-N(7)#1    | 149.4(3)   |
| N(1)-Zn(1)-Zn(1)#1   | 98.26(18)  | N(1)-Zn(1)-O(3)#1    | 101.7(2)   |
| N(1)-Zn(1)-O(3)      | 90.4(2)    | O(3)-Zn(2)-Cl(1)     | 112.74(15) |
| O(3)-Zn(2)-N(6)      | 98.9(2)    | N(6)-Zn(2)-Cl(1)     | 123.62(18) |
| N(2)-Zn(2)-Cl(1)     | 117.17(19) | N(2)-Zn(2)-O(3)      | 95.7(2)    |
| N(2)-Zn(2)-N(6)      | 103.9(2)   | Zn(1)-O(3)-Zn(1)#1   | 97.21(19)  |
| Zn(2)-O(3)-Zn(1)     | 111.9(2)   | Zn(2)-O(3)-Zn(1)#1   | 110.3(2)   |
| N(7)-N(6)-Zn(2)      | 107.6(4)   | C(18)-N(6)-Zn(2)     | 144.9(5)   |
| C(6)-N(2)-Zn(2)      | 139.5(5)   | N(1)-N(2)-Zn(2)      | 114.3(4)   |
| N(2)-N(1)-Zn(1)      | 125.3(5)   | C(1)-N(1)-Zn(1)      | 127.5(5)   |

Symmetry transformations used to generate equivalent atoms: #1: -x+1, -y+1, -z+1.

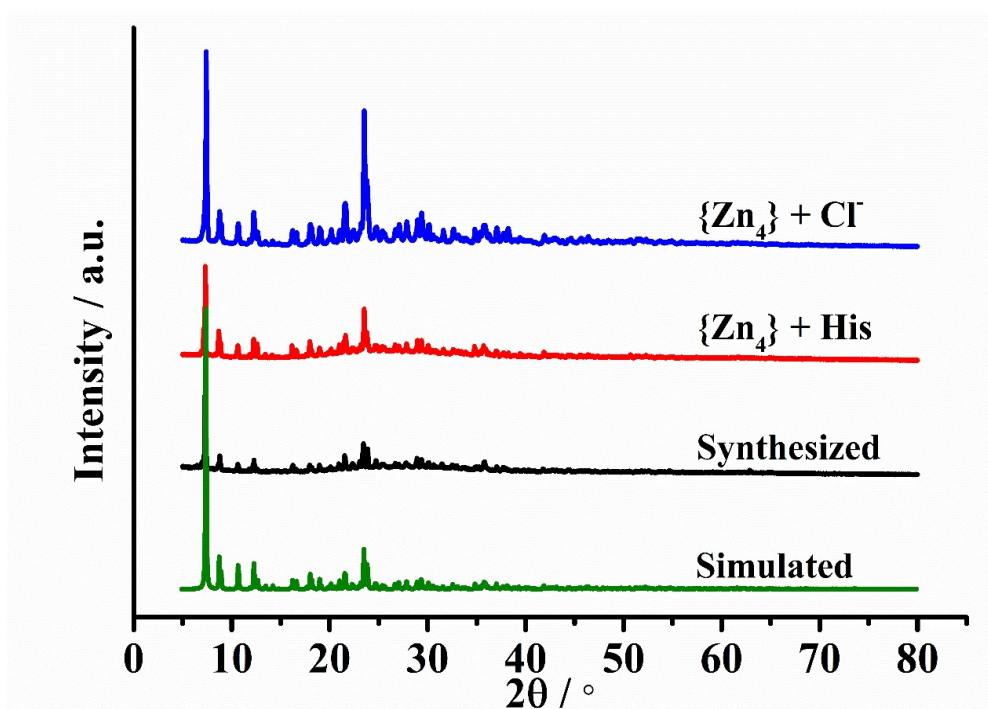

Fig. S1 PXRD of the  $\{Zn_4\}$  cluster after being immersed in aqueous solutions of  $Cl^-$  and His for 3 days.

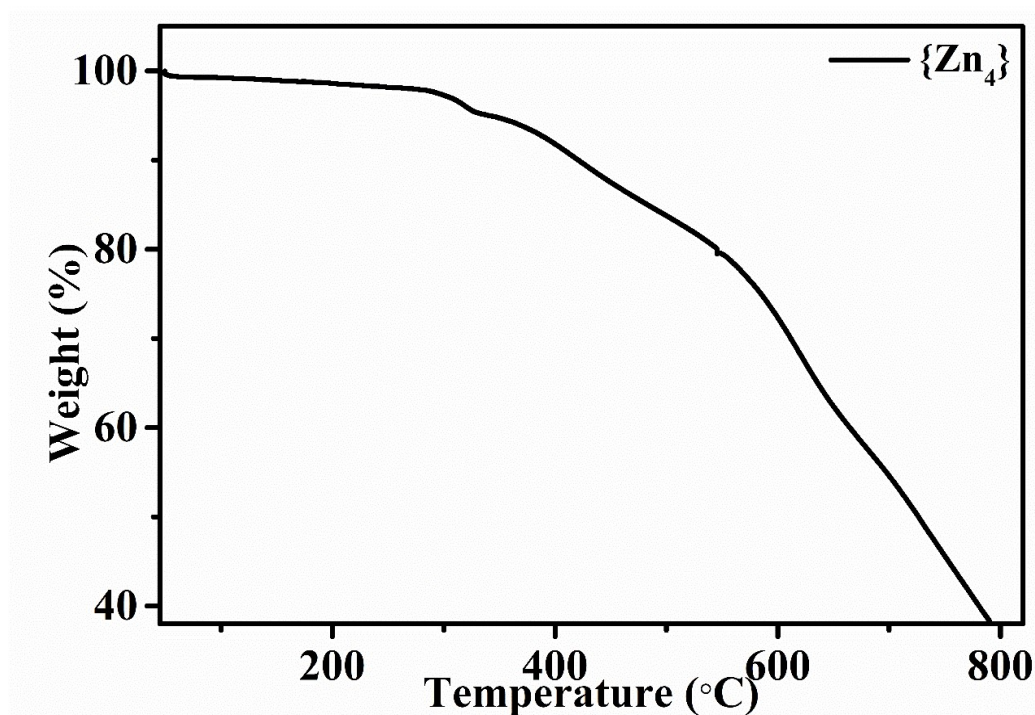

Fig. S2 The TGA curve of the  $\{Zn_4\}$  cluster.

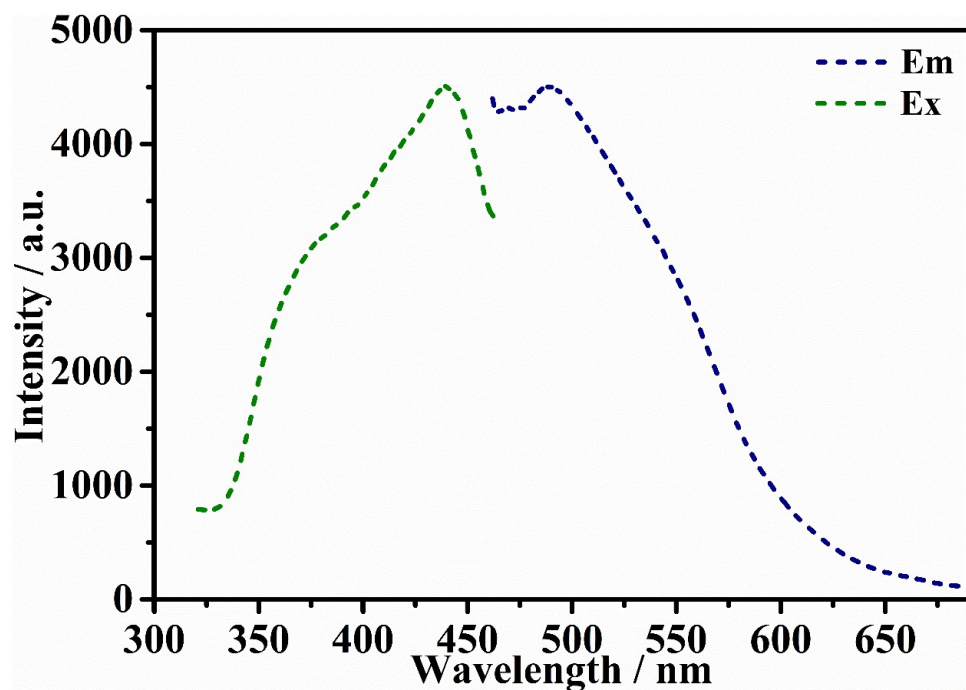

Fig. S3 Excitation and emission spectra of free Opt ligand.

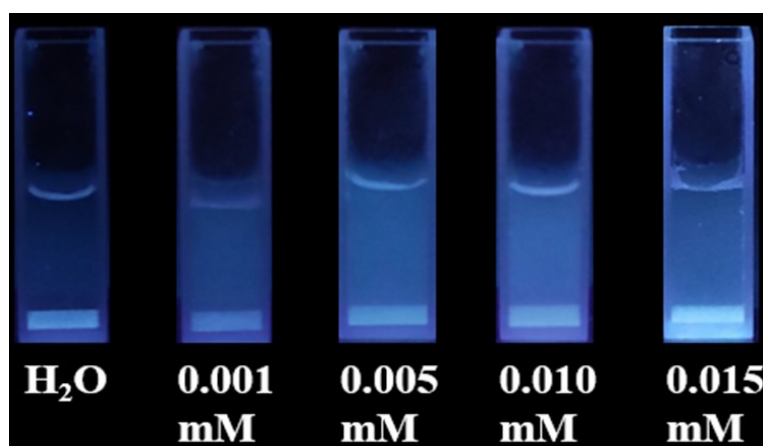

Fig. S4 Luminescence pictures of the  $\{Zn_4\}$  cluster in the presence of different concentrations of  $Cl^-$  under 365 nm UV lamp.

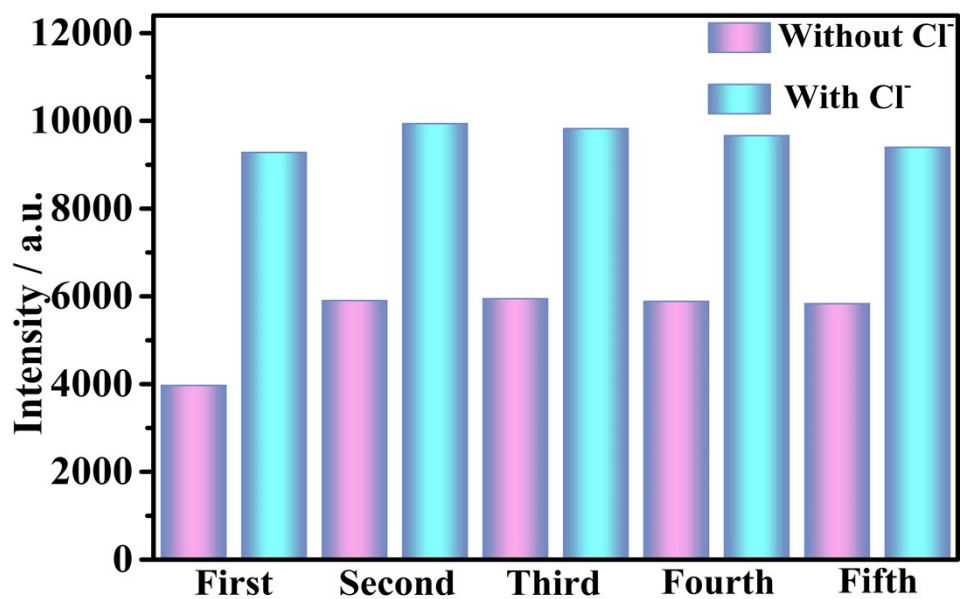

**Fig. S5.** The luminescence intensity of the {Zn<sub>4</sub>} cluster after five sensing cycles for Cl<sup>-</sup>.

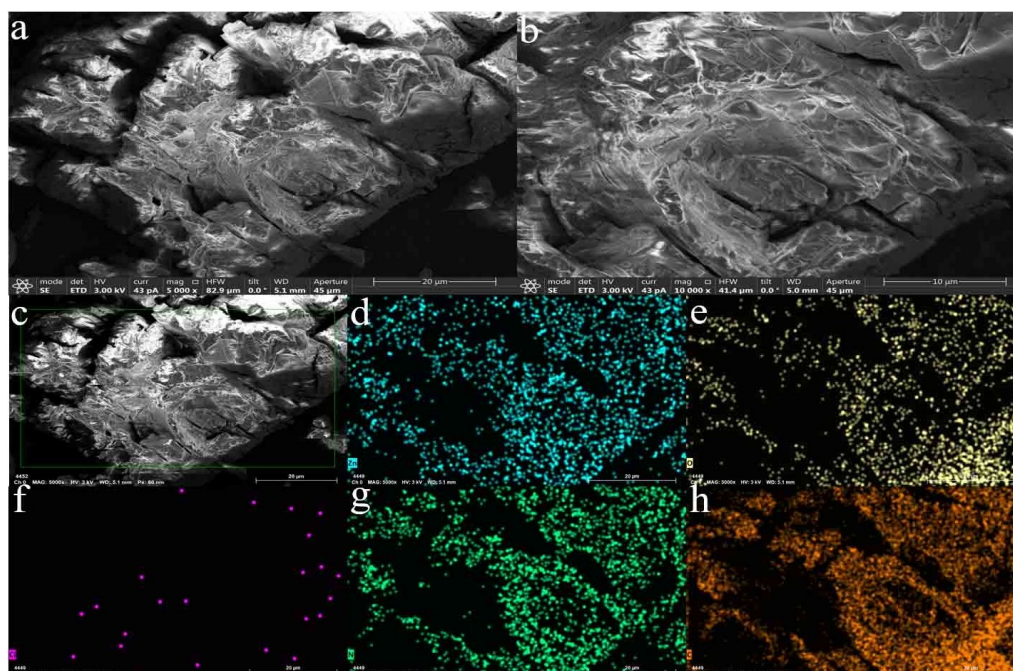

**Fig. S6** (a)-(c) SEM images of the {Zn<sub>4</sub>} cluster. (d)-(h) EDS mapping images of selected regions: Zn, O, Cl, N and C.

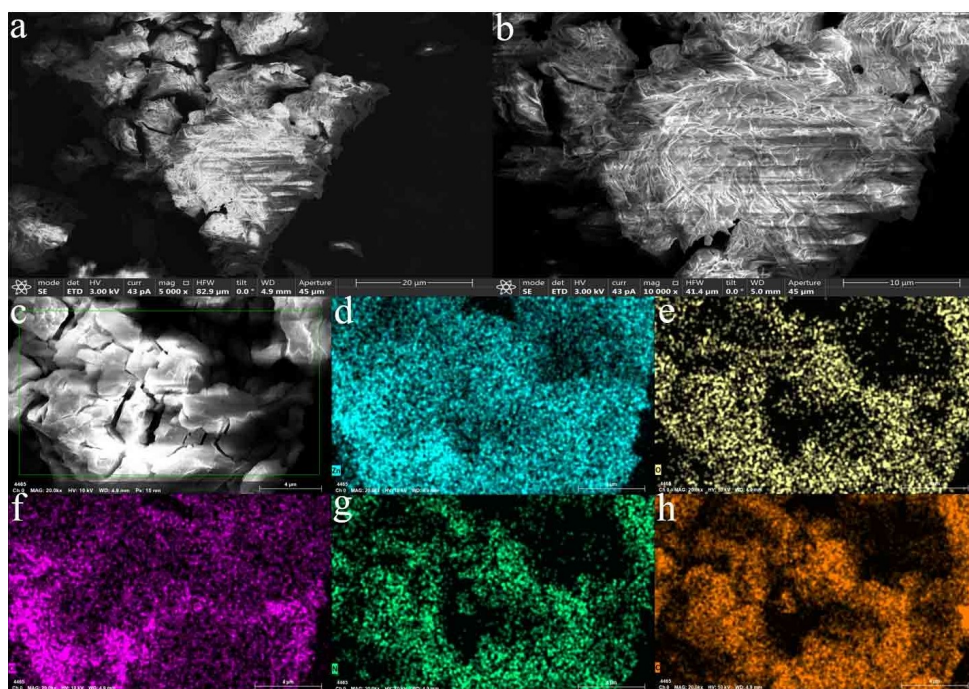

**Fig. S7** (a)-(c) SEM images of the  $\{Zn_4\}$  cluster treated with 1 mM aqueous solution of  $Cl^-$ . (d)-(h) EDS mapping images of selected regions: Zn, O, Cl, N and C.

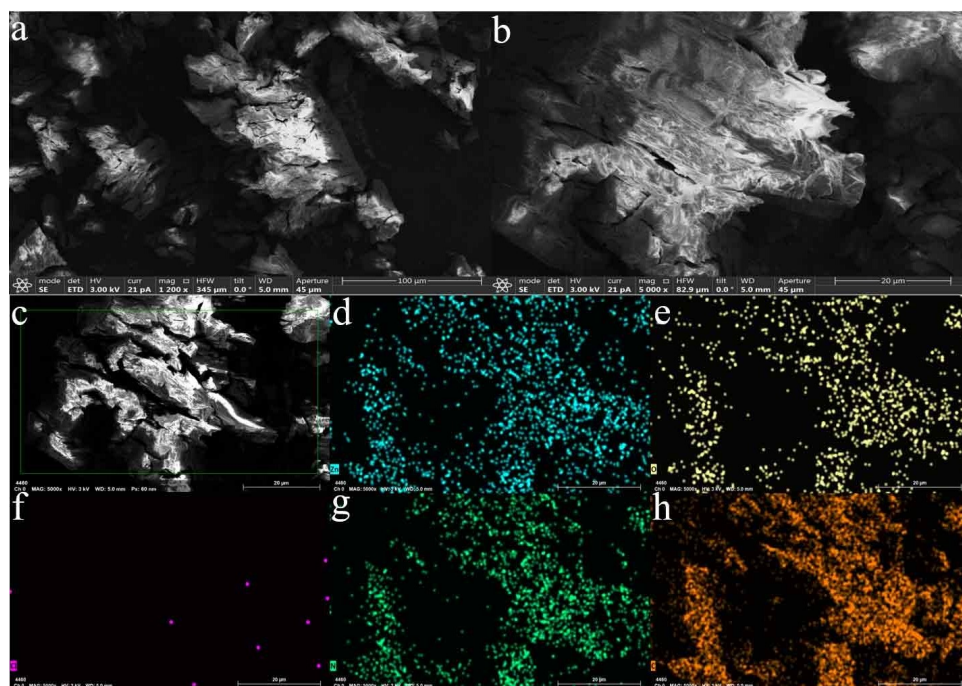

**Fig. S8** (a)-(c) SEM images of the  $\{Zn_4\}$  cluster treated with 1 mM aqueous solution of His. (d)-(h) EDS mapping images of selected regions: Zn, O, Cl, N and C.

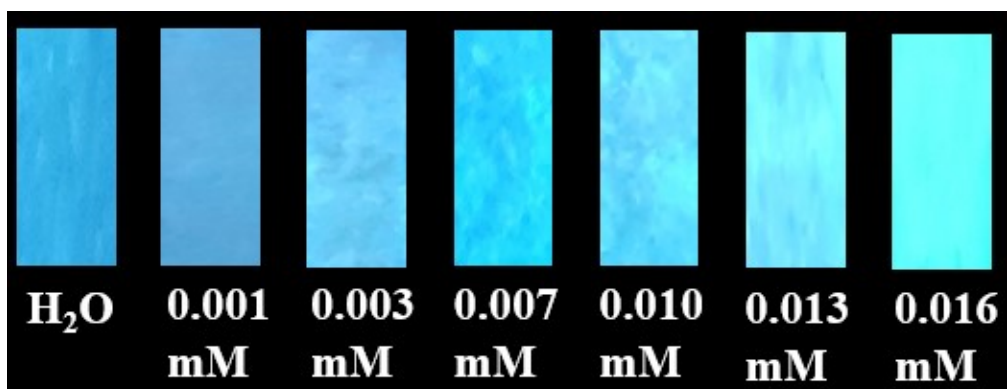

**Fig. S9** Luminescent test paper pictures of the {Zn<sub>4</sub>} cluster in the presence of different concentrations of Cl<sup>-</sup> under 365 nm UV lamp.

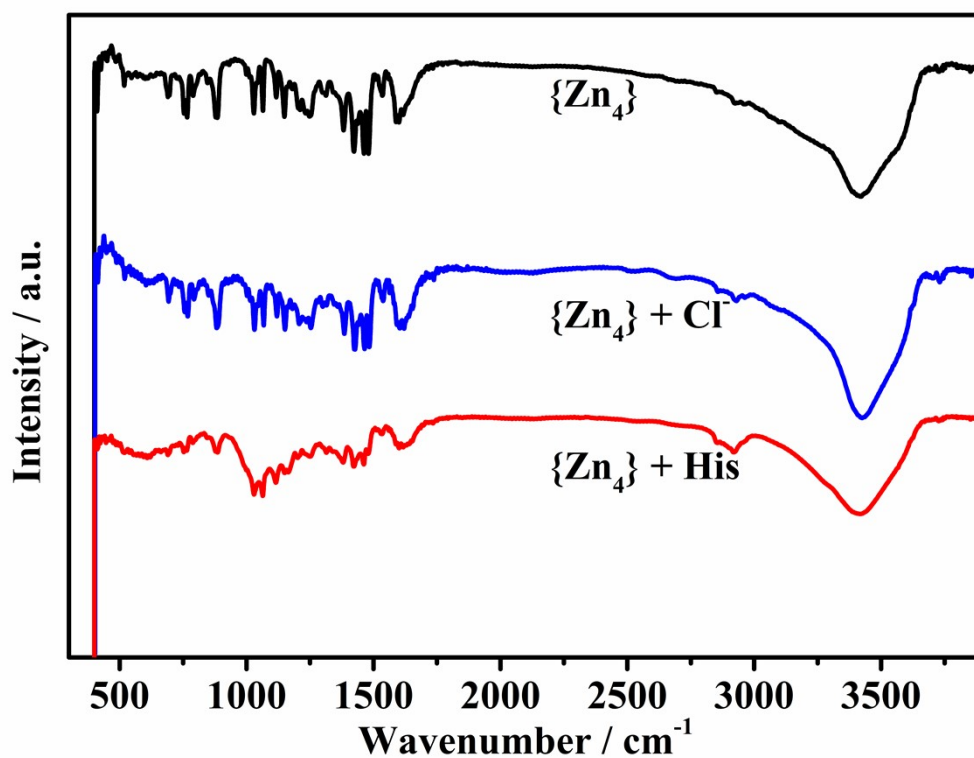

**Fig. S10** IR spectra of the {Zn<sub>4</sub>} cluster after being immersed in aqueous solutions of Cl<sup>-</sup> and His for 3 days.

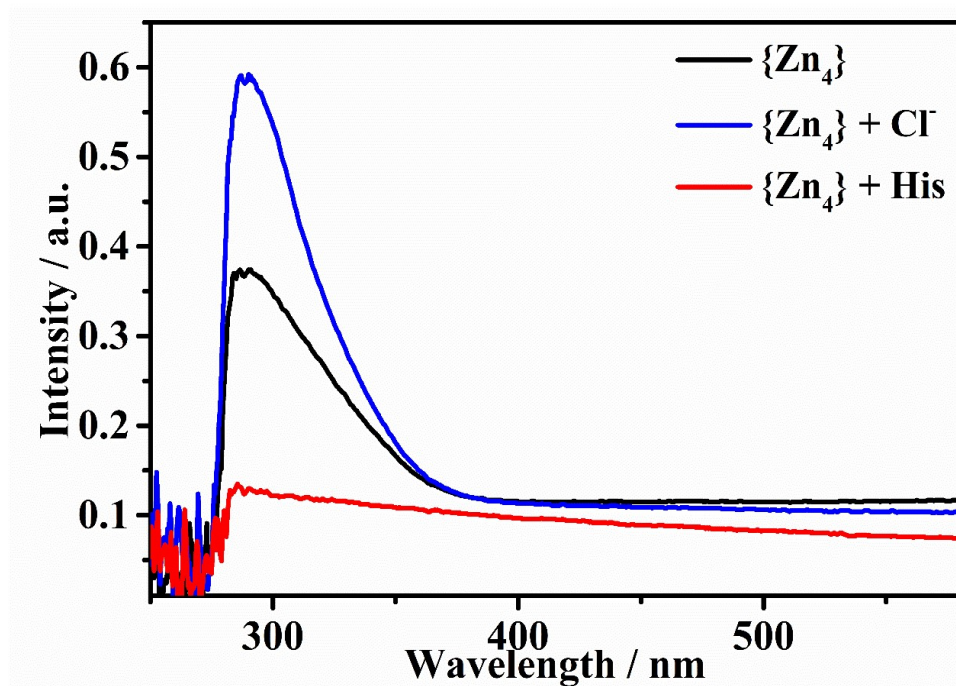

Fig. S11 UV-vis spectra of the {Zn<sub>4</sub>} cluster after being immersed in aqueous solutions of Cl<sup>-</sup> and His for 3 days.

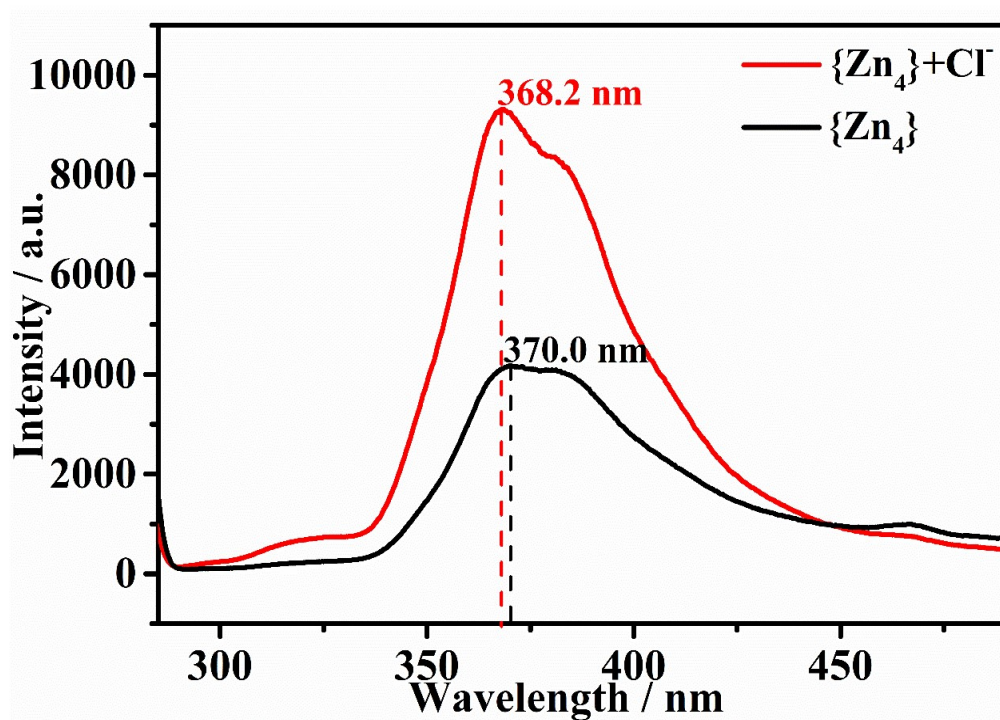

Fig. S12 Luminescence emission spectra of the {Zn<sub>4</sub>} cluster before and after sensing.



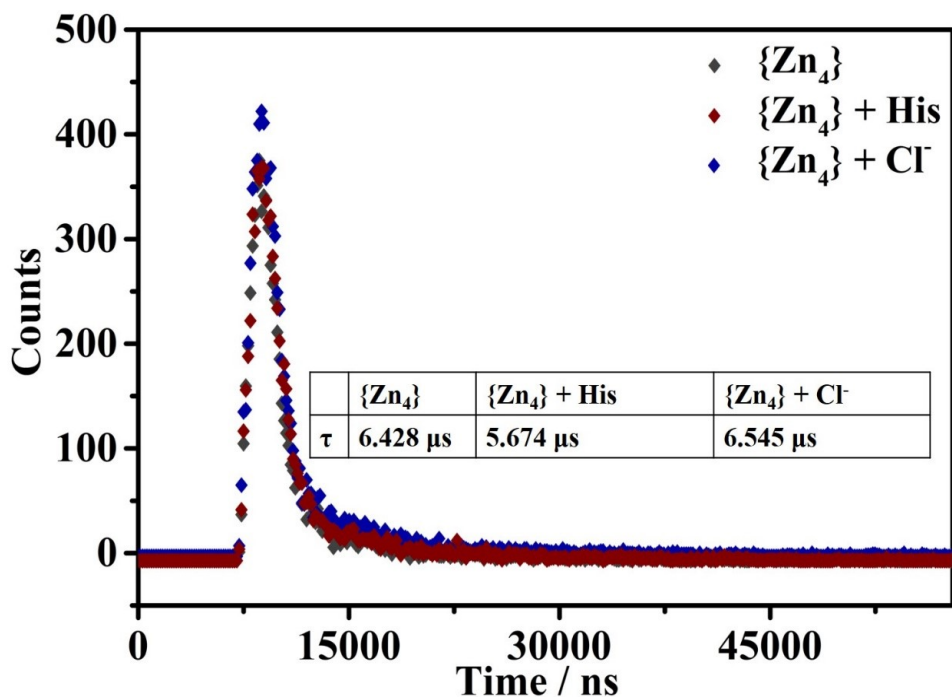

Fig. S13 The luminescence decay lifetimes of the  $\{Zn_4\}$  cluster after being immersed in aqueous solutions of  $Cl^-$  and His for 3 days.

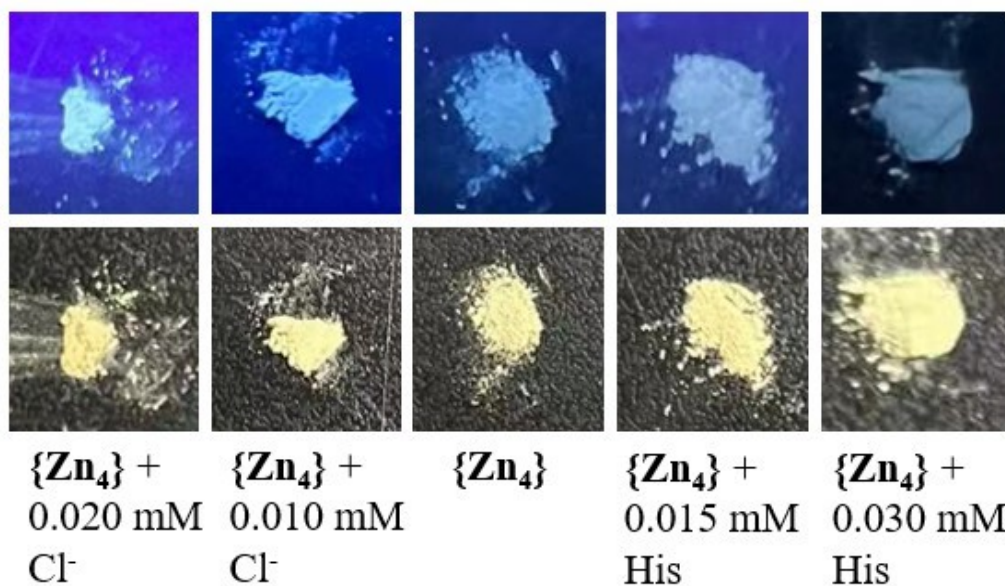

Fig. S14 Photos of the  $\{Zn_4\}$  cluster soaked in different concentrations of  $Cl^-/His$  aqueous solutions under 365 nm UV lamp.

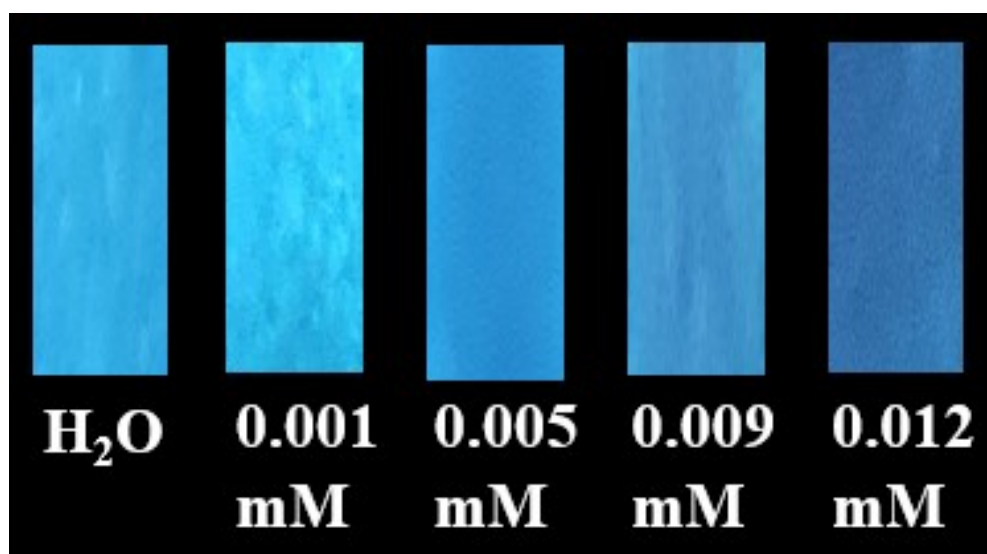

**Fig. S15** Luminescent test paper pictures in the presence of different concentrations of His under 365 nm UV lamp.

**Table S3.** Performance comparison among different analysis methods for probing Cl<sup>-</sup>.

| Cl <sup>-</sup>                       |               |                                           |                   |                           |
|---------------------------------------|---------------|-------------------------------------------|-------------------|---------------------------|
| Sensor                                | LODs/ $\mu$ M | Medium                                    | Method            | Refs.                     |
| The {Zn <sub>4</sub> } cluster        | 0.94          | H <sub>2</sub> O                          | Fluorescent       | <a href="#">This work</a> |
| Ag NWs/Pt/GCE                         | 20            | -                                         | Electroanalytical | S1                        |
| 3D-GN/CPE                             | 200           | -                                         | Electroanalytical | S2                        |
| QG@MA-Ag/GCE                          | 0.16          | -                                         | Electroanalytical | S3                        |
| M2                                    | 19            | H <sub>2</sub> O                          | Fluorescent       | S4                        |
| BeQ <sub>2</sub>                      | 66            | NaCl                                      | Fluorescent       | S5                        |
| Ag-PCN                                | 60            | H <sub>2</sub> O                          | Fluorescent       | S6                        |
| THPP                                  | 7.5           | HEPES                                     | Fluorescent       | S7                        |
| MQ-DS                                 | 180           | phosphate-citric acid buffer              | Fluorescent       | S8                        |
| CsPbBr <sub>3</sub><br>PQDs/cellulose | 4110          | H <sub>2</sub> O                          | Colorimetric      | S9                        |
| Ag <sup>+</sup> -FBI                  | 19            | HEPES buffer solution containing 10% DMSO | Fluorescent       | S10                       |
| MQAF                                  | 16700         | HEPES buffer solution                     | Fluorescent       | S11                       |

**Table S4.** The element ratio of the {Zn<sub>4</sub>} cluster untreated and treated with Cl<sup>-</sup> or His aqueous solution.

| System                                       | Zn/%  | Cl/% | O/%  | N/%   | C/%   |
|----------------------------------------------|-------|------|------|-------|-------|
| {Zn <sub>4</sub> } cluster                   | 19.67 | 3.93 | 9.2  | 22.7  | 44.5  |
| {Zn <sub>4</sub> } cluster + Cl <sup>-</sup> | 20.99 | 7.67 | 7.99 | 20.93 | 42.42 |
| {Zn <sub>4</sub> } cluster + His             | 18.36 | 3.66 | 9.33 | 23.84 | 44.81 |

**Table S5.** The  $E_{\text{HOMO}}$ ,  $E_{\text{LUMO}}$  and  $\Delta E$  of various ion systems.

| System                      | Zn1-Opt  | Zn1-Opt<br>+Cl <sup>-</sup> | Zn1-Opt<br>+F <sup>-</sup> | Zn1-Opt<br>+Br <sup>-</sup> | Zn1-Opt<br>+I <sup>-</sup> | Zn1-Opt<br>+OH <sup>-</sup> | Zn1-Opt<br>+SCN <sup>-</sup> |
|-----------------------------|----------|-----------------------------|----------------------------|-----------------------------|----------------------------|-----------------------------|------------------------------|
| $E_{\text{HOMO}}$<br>(a.u.) | -3.77787 | -0.22974                    | -0.54086                   | -0.22488                    | 0.02255                    | -0.39566                    | -0.23466                     |
| $\Delta E$<br>(a.u.)        | 0.02662  | 0.01400                     | 0.01718                    | 0.01511                     | 0.02255                    | 0.03726                     | 0.0143                       |
| $E_{\text{LUMO}}$<br>(a.u.) | -0.35125 | -0.21574                    | -0.52368                   | -0.20977                    | 1.00400                    | -0.35840                    | -0.22036                     |

**Table S6.** Performance comparison among different analysis methods for probing His.

| Histidine                            |                     |                                          |             |                           |
|--------------------------------------|---------------------|------------------------------------------|-------------|---------------------------|
| Sensor                               | LODs/ $\mu\text{M}$ | Medium                                   | Method      | Refs.                     |
| {Zn <sub>4</sub> } cluster           | 0.83                | H <sub>2</sub> O                         | Fluorescent | <a href="#">This work</a> |
| HPO <sub>x</sub> <sub>2</sub>        | 10                  | H <sub>2</sub> O                         | Chiroptical | S12                       |
| complex LAI <sup>3+</sup>            | 0.6                 | HEPES buffer                             | Fluorescent | S13                       |
| Eu-MOF                               | 100                 | H <sub>2</sub> O                         | Fluorescent | S14                       |
| BINOL-Zn                             | 0.35                | DMF/1%,<br>phosphate buffer              | Fluorescent | S15                       |
| CCS                                  | 7.64                | high water-content<br>solution           | Fluorescent | S16                       |
| Co-ETTB                              | 11                  | 50% THF aqueous<br>solution              | Fluorescent | S17                       |
| CAQA                                 | 26                  | aqueous ACN-<br>HEPES buffer<br>solution | Fluorescent | S18                       |
| CuL <sup>1</sup>                     | 10                  | DMSO/H <sub>2</sub> O (1:9,<br>v/v)      | Fluorescent | S19                       |
| Cu(pydxsemicarbazide)Cl <sub>2</sub> | 1.9                 | aqueous HEPES<br>buffer                  | Fluorescent | S20                       |

## References

- (S1) X. Qin, H. Wang, Z. Miao, X. Wang, Y. Fang, Q. Chen and X. Shao, Synthesis of Silver Nanowires and Their Applications in the Electrochemical Detection of Halide. *Talanta*, 2011, **84**, 673–678.
- (S2) M. Zhang, C. Wang, Z. Zhang, J. Ye and P. Fang, A Novel Carbon Paste Electrode for Sensitive, Selective and Rapid Electrochemical Determination of Chloride Ion Based on Three-Dimensional Graphene. *Sensor. Actuat. B-Chem.*, 2019, **299**, 126951.
- (S3) Y. Wan, Y. Hua, M. Liu, S. Li, M. Yin, X. Lv and H. Wang, Highly Selective Electroanalysis for Chloride Ions by Conductance Signal Outputs of Solid-State AgCl Electrochemistry Using Silver-Melamine Nanowires. *Sensor. Actuat. B-Chem.*, 2019, **300**, 127058.
- (S4) C. Ma, F. Y. Zhang, Y. Y. Wang, X. Y. Zhu, X. Y. Liu, C. Y. Zhao and H. X. Zhang, Synthesis and Application of Ratio Fluorescence Probe for Chloride. *Anal. Bioanal. Chem.*, 2018, **410**, 6507–6516.
- (S5) F. Y. Zhang, C. Ma, Y. Y. Wang, W. Liu, X. Y. Liu and H. X. Zhang, Fluorescent Probes for Chloride Ions in Biological Samples. *Spectrochim. Acta A.*, 2018, **205**, 428–434.
- (S6) Z. S. Zhang, Y. Gao, P. Li, B. H. Qu, Z. Y. Mu, Y. Liu, Y. Qu, D. G. Kong, Q. Chang and L. Q. Jing, Highly Sensitive Fluorescence Detection of Chloride Ion in Aqueous Solution with Ag-Modified Porous g-C<sub>3</sub>N<sub>4</sub> Nanosheets. *Chin. Chem. Lett.*, 2020, **31**, 2725–2729.
- (S7) F. Y. Zhang, C. Ma, Z. J. Jiao, S. Mu, Y. D. Zhang, X. Y. Liu and H. X. Zhang, A NIR Turn-on Fluorescent Sensor for Detection of Chloride Ions in Vitro and in Vivo. *Spectrochim. Acta A.*, 2020, **228**, 117729.
- (S8) P. Li, S. Zhang, N. Fan, H. Xiao, W. Zhang, W. Zhang, H. Wang and B. Tang, Quantitative Fluorescence Ratio Imaging of Intralysosomal Chloride Ions with Single Excitation/Dual Maximum Emission. *Chem. Eur. J.*, 2014, **20**, 11760–11767.
- (S9) B. Park, S. M. Kang, G. W. Lee, C. H. Kwak, M. Rethinasabapathy and Y. S.

- Huh, Fabrication of CsPbBr<sub>3</sub> Perovskite Quantum Dots/Cellulose-Based Colorimetric Sensor: Dual-Responsive On-Site Detection of Chloride and Iodide Ions. *Ind. Eng. Chem. Res.*, 2020, **59**, 793–801.
- (S10) J. Kim, S. J. Lee, S. Kim, M. Jung, H. Lee and M. S. Han, Development of A Fluorescent Chemosensor for Chloride Ion Detection in Sweat Using Ag<sup>+</sup>-Benzimidazole Complexes. *Dyes Pigm.*, 2020, **177**, 108291.
- (S11) P. Li, T. Xie, N. N. Fan, K. X. Li and B. Tang, Ratiometric Fluorescence Imaging for Distinguishing Chloride Concentration Between Normal and Ischemic Ventricular Myocytes. *Chem. Commun.*, 2012, **48**, 2077–2079.
- (S12) K. Liu, G. Du, L. Ye and L. Jiang, A Chiroptical Nanoprobe for Highly Selective Recognition of Histidine Enantiomers in Aqueous Media. *Sensor. Actuat. B-Chem.*, 2019, **284**, 55–62.
- (S13) E. Oliveira, C. Santos, P. Poeta, J. L. Capelo and C. Lodeiro, Turn-on Selective Vitamin B6 Derivative Fluorescent Probe for Histidine Detection in Biological Samples. *Analyst*, 2013, **138**, 3642–3645.
- (S14) A. F. Yang, S. L. Hou, Y. Shi, G. L. Yang, D. B. Qin and B. Zhao, Stable Lanthanide-Organic Framework As A Luminescent Probe to Detect Both Histidine and Aspartic Acid in Water. *Inorg. Chem.*, 2019, **58**, 6356–6362.
- (S15) Y. Mao, M. A. Abed, N. B. Lee, X. Wu, G. Du and L. Pu, Determining the Concentration and Enantiomeric Composition of Histidine Using One Fluorescent Probe. *Chem. Commun.*, 2021, **57**, 587–590.
- (S16) A. Pundi, C. J. Chang, J. Chen, S. R. Hsieh and M. C. Lee, A Chiral Carbazole Based Sensor for Sequential “On-Off-On” Fluorescence Detection of Fe<sup>3+</sup> and Tryptophan/histidine. *Sensor. Actuat. B-Chem.*, 2021, **328**, 129084.
- (S17) X. L. Guo, N. S. Zhu, S. P. Wang, G. H. Li, F. Q. Bai, Y. Li, Y. H. Han, B. Zou, X. B. Chen, Z. Shi and S. H. Feng, Stimuli-Responsive Luminescent Properties of Tetraphenylethene-Based Strontium and Cobalt Metal–Organic Frameworks. *Angew. Chem. Int. Ed.*, 2020, **59**, 19716–19721.
- (S18) Q. H. You, A. W. M. Lee, W. H. Chan, X. M. Zhu and K. C. F. Leung, A Coumarin-Based Fluorescent Probe for Recognition of Cu<sup>2+</sup> and Fast Detection of

Histidine in Hard-To-Transfect Cells by a Sensing Ensemble Approach. *Chem. Commun.*, 2014, **50**, 6207–6210.

(S19) D. Wang, J. Q. Zheng, X. J. Zheng, D. C. Fang, D. Q. Yuan and L. P. Jin, A Fluorescent Chemosensor for the Sequential Detection of Copper (II) and Histidine and Its Biological Applications. *Sensor. Actuat. B-Chem.*, 2016, **228**, 387–394.

(S20) C. Das, B. Pakhira, A. L. Rheingold and S. K. Chattopadhyay, Turn on ESIPT Based Chemosensor for Histidine: Application in Urine Analysis and Live Cell Imaging. *Inorg. Chim. Acta*, 2018, **482**, 292–298.
